# Supplementary material for: Herbal Honey Preparations of Curcuma Xanthorriza and Black Cumin Protect against Carcinogenesis through Antioxidant and Immunomodulatory Activities in Sprague Dawley (SD) Rats Induced with Dimethylbenz(a)anthracene
Source: MDPI journal article supplement (doi:10.3390/nu15020371), 2023-01-11
Supplement: s1 [file s1]

Supplementary material 1.

**Table 1.** Phytochemical analysis of CXE, BCE, and CXBCH preparations.

| Test                | Samples and materials |            |                   |
|---------------------|-----------------------|------------|-------------------|
|                     | CXE                   | BCE        | CXBCH Preparation |
| <b>Qualitative</b>  |                       |            |                   |
| Alkaloids           | ++                    | +          | ++                |
| Flavonoids          | ++                    | ++         | ++                |
| Phenolic            | ++                    | ++         | ++                |
| Saponins            | +                     | +          | +                 |
| Triterpenoids       | +                     | ++         | +                 |
| <b>Quantitative</b> |                       |            |                   |
| Polyphenol          | 142.23 ppm            | 42.51 ppm  | 38.87 ppm         |
| Flavonoids          | 116.41 ppm            | 31.74 ppm  | 56.86 ppm         |
| Thymoquinone        | -                     | 54.71 mg/g | 46.45 mg/mL       |
| Curcumin            | 62.28 mg/mL           | -          | 68.86 mg/mL       |

Supplementary material 2

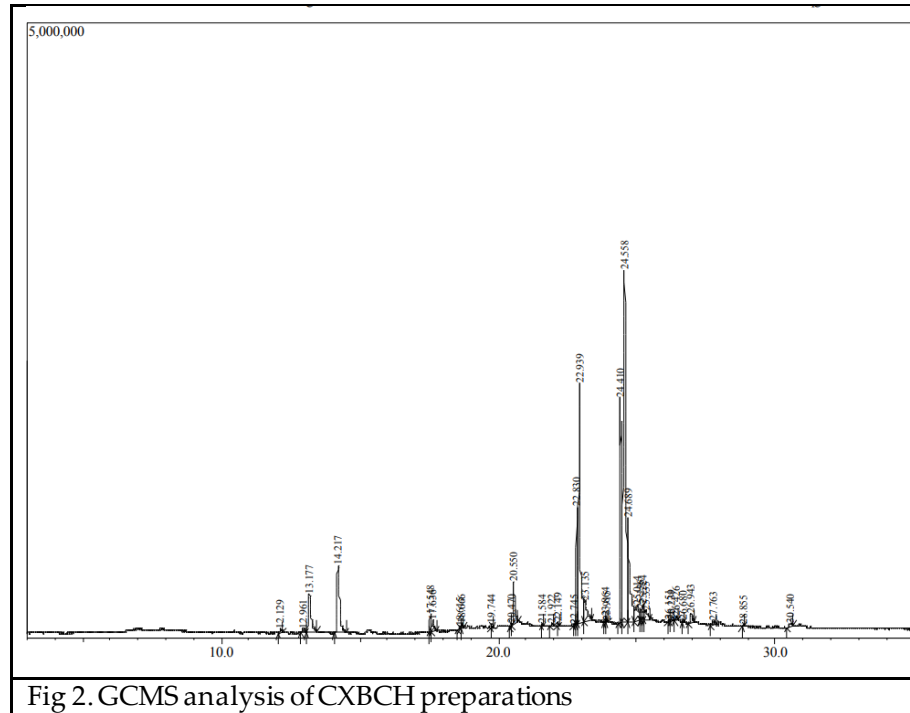

Table 2. profile volatile Compounds of CXBCH preparations, CXE, and BCE from the GCMS examination

| No Peak | R.Time | I.Time | F.Time | Composition | Formula    | Name                                                                                                    |
|---------|--------|--------|--------|-------------|------------|---------------------------------------------------------------------------------------------------------|
| 1       | 12.129 | 12.045 | 12.240 | 0.32        | C15H24     | 1,6,10-dodecatriene, 7,11-dimethyl-3-methylene-, (e)-                                                   |
| 2       | 12.961 | 12.870 | 13.080 | 0.32        | C15H24     | gamma.-curcumene                                                                                        |
| 3       | 13.177 | 13.080 | 13.455 | 4.14        | C15H22     | benzene, 1-(1,5-dimethyl-4-hexenyl)-4-methyl-                                                           |
| 4       | 14.217 | 14.090 | 14.495 | 6.82        | C15H24     | gamma.-curcumene                                                                                        |
| 5       | 17.548 | 17.485 | 17.600 | 0.94        | C15H22O    | beta.-Elemenone (CAS)                                                                                   |
| 6       | 17.636 | 17.600 | 17.765 | 0.76        | C9H14N2O3S | n-(4-hydroxyphenyl)-n,n',n'-trimethylsulfamide                                                          |
| 7       | 18.615 | 18.535 | 18.630 | 0.11        | C15H22O2   | 6-(1-Hydroxymethylvinyl)-4,8a-dimethyl-3,5,6,7,8,8a-hexahydro-1H-naphthalen-2-one                       |
| 8       | 18.666 | 18.630 | 18.750 | 0.27        | C17H33Cl   | 7-Heptadecene, 1-chloro- (CAS)                                                                          |
| 9       | 19.744 | 19.710 | 19.780 | 0.12        | C15H26O    | Juniper camphor                                                                                         |
| 10      | 20.470 | 20.415 | 20.505 | 0.10        | C24H32O6   | medrol acetate                                                                                          |
| 11      | 20.550 | 20.505 | 20.705 | 3.04        | C9H12O     | Cc1cc(C)c(O)c(C)c1                                                                                      |
| 12      | 21.584 | 21.550 | 21.640 | 0.08        | C20H40O    | 3,7,11,15-Tetramethyl-2-hexadecen-1-ol                                                                  |
| 13      | 21.922 | 21.880 | 22.010 | 0.13        | C12H22O    | 2-methyl-10-undecenal                                                                                   |
| 14      | 22.149 | 22.110 | 22.205 | 0.12        | C21H38O4   | 9-Octadecenoic acid, 12-(acetyloxy)-, methyl ester, [R-(Z)]- (CAS)                                      |
| 15      | 22.745 | 22.695 | 22.785 | 0.08        | C12H22O2   | cyclooctanecarbonic acid, 4-methyl-, ethylester                                                         |
| 16      | 22.830 | 22.785 | 22.860 | 3.36        | C18H36O2   | Hexadecanoic acid, ethyl ester (CAS)                                                                    |
| 17      | 22.939 | 22.860 | 23.105 | 16.49       | C16H32O2   | Hexadecanoic acid (CAS)                                                                                 |
| 18      | 23.135 | 23.105 | 23.365 | 2.06        | C20H40O2   | Eicosanoic acid (CAS)                                                                                   |
| 19      | 23.864 | 23.795 | 23.895 | 0.24        | C19H36O2   | 9-Octadecenoic acid, methyl ester (CAS)                                                                 |
| 20      | 23.915 | 23.895 | 23.975 | 0.10        | C46H58N4O8 | 14'-epi-20'-deoxyvincovaline                                                                            |
| 21      | 24.410 | 24.345 | 24.465 | 10.99       | C20H36O2   | Ethyl linoleate                                                                                         |
| 22      | 24.558 | 24.465 | 24.660 | 33.65       | C16H30O2   | 9-Hexadecenoic acid (CAS)                                                                               |
| 23      | 24.689 | 24.660 | 24.925 | 8.88        | C18H36O2   | octadecanoic acid                                                                                       |
| 24      | 25.014 | 24.925 | 25.110 | 2.08        | C22H38O2   | Cyclopropanecarboxylic acid, 2-[[2-[(2-ethylcyclopropyl)methyl]cyclopropyl]methyl]-, methyl ester (CAS) |
| 25      | 25.136 | 25.110 | 25.170 | 0.56        | C16H27NO4  | 6-Nitro-cyclohexadecane-1,3-dione                                                                       |
| 26      | 25.224 | 25.170 | 25.265 | 1.06        | C18H36O3   | Hexadecanoic acid, 2-hydroxyethyl ester (CAS)                                                           |
| 27      | 25.335 | 25.265 | 25.485 | 1.12        | C21H38O2   | 11,14-Eicosadienoic acid, methyl ester (CAS)                                                            |
| 28      | 26.151 | 26.110 | 26.200 | 0.10        | C18H32O2   | 9,12-Octadecadienoic acid (Z,Z)- (CAS)                                                                  |
| 29      | 26.239 | 26.200 | 26.360 | 0.18        | C18H34O2   | 9-Octadecenoic acid (Z)- (CAS)                                                                          |
| 30      | 26.426 | 26.360 | 26.505 | 0.27        | C20H40O2   | Eicosanoic acid (CAS)                                                                                   |
| 31      | 26.680 | 26.640 | 26.720 | 0.10        | C20H37ClO2 | 2-Chloroethyl oleate                                                                                    |
| 32      | 26.943 | 26.885 | 27.055 | 0.69        | C21H40O3   | Oleic acid, 3-hydroxypropyl ester (CAS)                                                                 |
| 33      | 27.763 | 27.680 | 27.875 | 0.35        | C19H38O4   | Hexadecanoic acid, 2-hydroxy-1-(hydroxymethyl)ethyl ester (CAS)                                         |
| 34      | 28.855 | 28.780 | 28.895 | 0.09        | C12H24O2   | Decanoic acid, ethyl ester (CAS)                                                                        |
| 35      | 30.540 | 30.435 | 30.640 | 0.28        | C20H38O3   | 9-Octadecenoic acid (Z)-, 2-hydroxyethyl ester (CAS)                                                    |
| Total   |        |        |        | 100.00      |            |                                                                                                         |

Supplementary material 4

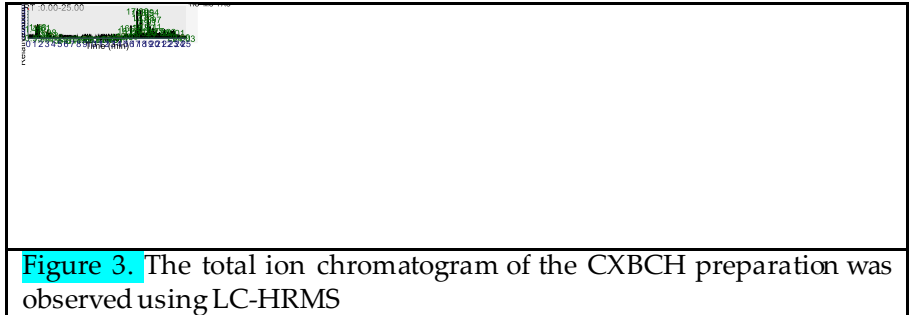

## Supplementary material 5

**Tabel 3.** Formula, molecule name, RT, annotation delta mass and max area (absolute) observed with LC-HRMS from CXBCH preparations.

| No | Name                                         | Formula  | Annot. DeltaMass [ppm] | Calc. MW  | RT [min] | Area (Max.) |
|----|----------------------------------------------|----------|------------------------|-----------|----------|-------------|
| 1  | Linoleic acid                                | C18H32O2 | -3.41                  | 280.23927 | 22.713   | 73665569215 |
| 2  | eremanthin                                   | C15H18O2 | -3.27                  | 230.12993 | 17.869   | 49142859119 |
| 3  | 1,5-Anhydro-D-fructose                       | C6H10O5  | -2.94                  | 162.05235 | 1.57     | 23076928966 |
| 4  | Oleic acid                                   | C18H34O2 | -3.18                  | 282.25498 | 20.527   | 20748954114 |
| 5  | 1,5-Anhydro-6-deoxy-D-threo-hex-1-en-3-ulose | C6H8O4   | -2.08                  | 144.04196 | 1.606    | 16831135065 |
| 6  | 1-Linoleoyl glycerol                         | C21H38O4 | -4.96                  | 354.27525 | 21.601   | 16123655143 |
| 7  | Monoolein                                    | C21H40O4 | -4.44                  | 356.29108 | 23.058   | 15577251606 |
| 8  | TURMERONE, AR-                               | C15H20O  | -3.22                  | 216.15072 | 17.516   | 10297107430 |
| 9  | Meglutol                                     | C6H10O5  | -2.54                  | 162.05241 | 3.029    | 10269644874 |
| 10 | L- $\alpha$ -PALMITIN                        | C19H38O4 | -4.13                  | 330.27564 | 22.528   | 9837543783  |
| 11 | 9-Oxo-10(E),12(E)-octadecadienoic acid       | C18H30O3 | -3.01                  | 294.21861 | 19.108   | 9468689328  |
| 12 | (E)-6-hydroxyoctadec-4-enoic acid            | C18H34O3 | -3.02                  | 298.2499  | 19.444   | 9449669222  |
| 13 | Curcumin                                     | C21H20O6 | -3.55                  | 368.12468 | 16.266   | 9142424073  |
| 14 | (E,E)-alpha-Farnesene                        | C15H24   | -3.33                  | 204.18712 | 19.747   | 8176647345  |

|    |                                                        |                   |       |               |            |                |
|----|--------------------------------------------------------|-------------------|-------|---------------|------------|----------------|
| 15 | S-Curcumene                                            | C15<br>H22        | -3.69 | 202.171<br>4  | 18.93<br>8 | 7151614<br>798 |
| 16 | 9(Z),11(E),13(E)-Octadecatrienoic Acid methyl ester    | C19<br>H32<br>O2  | -3.8  | 292.239<br>12 | 20.09<br>3 | 6795616<br>369 |
| 17 | Pyrogallol                                             | C6 H6<br>O3       | -1.7  | 126.031<br>48 | 3.29       | 6146490<br>443 |
| 18 | (2E)-3-(3-Hydroxyphenyl)acrylaldehyde                  | C9 H8<br>O2       | -2.26 | 148.052<br>1  | 17.86<br>1 | 4610742<br>991 |
| 19 | 11(Z),14(Z)-Eicosadienoic acid                         | C20<br>H36<br>O2  | -2.98 | 308.270<br>61 | 21.89<br>7 | 4532720<br>559 |
| 20 | (-)-Camphor                                            | C10<br>H16 O      | -2.9  | 152.119<br>67 | 15.39<br>5 | 4482468<br>927 |
| 21 | $\alpha$ -Eleostearic acid                             | C18<br>H30<br>O2  | -2.41 | 278.223<br>91 | 19.15<br>1 | 4016574<br>114 |
| 22 | NP-020521                                              | C18<br>H32<br>O3  | -2.87 | 296.234<br>29 | 19.14<br>8 | 3964161<br>053 |
| 23 | Prednisone                                             | C21<br>H26<br>O5  | -4.41 | 358.176<br>45 | 16.46<br>4 | 3457086<br>374 |
| 24 | (2S)-2,3-Dihydroxypropyl (11Z,14Z)-11,14-icosadienoate | C23<br>H42<br>O4  | -3.37 | 382.307<br>02 | 19.25<br>2 | 3356497<br>775 |
| 25 | 2,2'-Methylenebis(4-methyl-6-tert-butylphenol)         | C23<br>H32<br>O2  | -3    | 340.239<br>21 | 21.28<br>2 | 2849183<br>680 |
| 26 | Carvone                                                | C10<br>H14 O      | -2.35 | 150.104<br>11 | 18.92<br>1 | 2780665<br>813 |
| 27 | 3,4-Dihydrocadalene                                    | C15<br>H20        | -3.23 | 200.155<br>86 | 19.10<br>5 | 2407722<br>995 |
| 28 | Oleamide                                               | C18<br>H35 N<br>O | -2.8  | 281.271<br>08 | 22.39<br>9 | 2172824<br>383 |
| 29 | Monoolein                                              | C21<br>H40<br>O4  | -4.45 | 356.291<br>07 | 22.48<br>2 | 1982732<br>023 |
| 30 | 1-Stearoylglycerol                                     | C21<br>H42<br>O4  | -4.28 | 358.306<br>77 | 20.71<br>6 | 1962687<br>838 |
| 31 | Etretinate                                             | C23<br>H30<br>O3  | -2.87 | 354.218<br>48 | 19.74<br>6 | 1948205<br>351 |

|    |                                                                                                                                                  |                    |       |               |            |                 |
|----|--------------------------------------------------------------------------------------------------------------------------------------------------|--------------------|-------|---------------|------------|-----------------|
| 32 | NP-019983                                                                                                                                        | C20<br>H16<br>O6   | -3.39 | 352.093<br>5  | 14.72<br>6 | 1934173<br>852  |
| 33 | Phloroglucinol                                                                                                                                   | C6 H6<br>O3        | -1.55 | 126.031<br>5  | 3.555      | 1931287<br>884  |
| 34 | Stearidonic acid                                                                                                                                 | C18<br>H28<br>O2   | -2.32 | 276.208<br>29 | 19.07<br>4 | 1815011<br>551  |
| 36 | geranyl quinone                                                                                                                                  | C16<br>H20<br>O2   | -2.98 | 244.145<br>6  | 17.46<br>8 | 1656123<br>930  |
| 37 | 5,6,7-Trihydroxy-8-(3-methyl-2-buten-1-yl)-4-phenyl-2H-chromen-2-one                                                                             | C20<br>H18<br>O5   | -2.99 | 338.114<br>41 | 16.28<br>5 | 1552047<br>892  |
| 38 | 5-hydroxy-4-methoxy-5,6-dihydro-2H-pyran-2-one                                                                                                   | C6 H8<br>O4        | -2.47 | 144.041<br>9  | 3.556      | 1504039<br>499  |
| 39 | Wighteone                                                                                                                                        | C20<br>H18<br>O5   | -2.6  | 338.114<br>54 | 16.63<br>6 | 1313576<br>685  |
| 40 | (2S)-3-(4-Hydroxyphenyl)-2-([[(3S,4S,5R)-2,3,4-trihydroxy-5-(hydroxymethyl)tetrahydro-2-furanyl]methyl]amino)propanoic acid (non-preferred name) | C15<br>H21 N<br>O8 | -3.71 | 343.125<br>44 | 1.374      | 1253477<br>230  |
| 41 | 8Z,11Z,14Z-Eicosatrienoic acid                                                                                                                   | C20<br>H34<br>O2   | -3.9  | 306.254<br>69 | 20.64<br>3 | 1239989<br>132  |
| 42 | (+/-)12(13)-DiHOME                                                                                                                               | C18<br>H34<br>O4   | -2.72 | 314.244<br>86 | 18.13<br>8 | 1175250<br>981  |
| 43 | NP-011548                                                                                                                                        | C18<br>H34<br>O3   | -3.44 | 298.249<br>77 | 20.56<br>3 | 1122064<br>288  |
| 44 | $\alpha$ -Linolenic acid                                                                                                                         | C18<br>H30<br>O2   | -2.95 | 278.223<br>76 | 21.66<br>7 | 1080906<br>094  |
| 45 | (-)-Caryophyllene oxide                                                                                                                          | C15<br>H24 O       | -3.36 | 220.181<br>97 | 14.47<br>1 | 9963650<br>54.1 |
| 46 | Curcumene                                                                                                                                        | C15<br>H22         | -3.69 | 202.171<br>4  | 17.40<br>1 | 9691705<br>27.2 |
| 47 | $\alpha$ -Eleostearic acid                                                                                                                       | C18<br>H30<br>O2   | -2.37 | 278.223<br>92 | 22.49<br>3 | 8732276<br>11.3 |
| 48 | 2,4-Dimethylbenzaldehyde                                                                                                                         | C9 H10<br>O        | -2.78 | 134.072<br>79 | 19.35<br>5 | 7875235<br>27.3 |
| 49 | (3 $\beta$ ,24R,24'R)-fucosterolepoide                                                                                                           | C29<br>H48<br>O2   | -3.84 | 428.363<br>79 | 20.39<br>3 | 5945264<br>84.4 |

|    |                                                                  |                      |       |               |            |                 |
|----|------------------------------------------------------------------|----------------------|-------|---------------|------------|-----------------|
| 50 | O-Demethylcurcumin                                               | C20<br>H18<br>O6     | -2.69 | 354.109<br>38 | 15.86<br>8 | 5810967<br>44.5 |
| 51 | (16beta)-16,21-Epoxypregna-4,17-diene-3,11,21-trione             | C21<br>H24<br>O4     | -3.32 | 340.166<br>33 | 18.56<br>9 | 5386393<br>59.5 |
| 52 | 1-[(11Z,14Z)]-icosadienoyl-sn-glycero-3-phosphocholine           | C28<br>H54 N<br>O7 P | -3.18 | 547.362<br>05 | 18.92<br>4 | 5060813<br>86   |
| 53 | (+/-)9-HpODE                                                     | C18<br>H32<br>O4     | -3.04 | 312.229<br>11 | 18.05<br>6 | 4630656<br>94.7 |
| 54 | 16-Hydroxyhexadecanoic acid                                      | C16<br>H32<br>O3     | -2.33 | 272.234<br>51 | 21.83<br>2 | 4460572<br>99.6 |
| 55 | (15Z)-9,12,13-Trihydroxy-15-octadecenoic acid                    | C18<br>H34<br>O5     | -2.25 | 330.239<br>88 | 16.17<br>9 | 4326873<br>55.6 |
| 56 | 5-Methoxy-7-(4-hydroxy-3-methoxyphenyl)-1-phenyl-3-heptanone     | C21<br>H26<br>O4     | -3.17 | 342.182<br>02 | 19.46<br>4 | 4320299<br>34.4 |
| 57 | 3-Ethylphenol                                                    | C8 H10<br>O          | -2.9  | 122.072<br>81 | 16.24      | 3855265<br>16.2 |
| 58 | 1,3,7-Trihydroxy-2,8-bis(3-methyl-2-buten-1-yl)-9H-xanthen-9-one | C23<br>H24<br>O5     | 4.96  | 380.164<br>26 | 22.71<br>1 | 3679616<br>42.2 |
| 59 | 1-Naphthol                                                       | C10 H8<br>O          | -2.35 | 144.057<br>18 | 17.61<br>5 | 3609529<br>78.5 |
| 60 | (±)9-HpODE                                                       | C18<br>H32<br>O4     | -3.04 | 312.229<br>11 | 19.35<br>6 | 3395006<br>63.4 |
| 61 | all-trans-4,4'-diapo-zeta-carotene                               | C30<br>H44           | -2.68 | 404.343<br>22 | 18.90<br>1 | 3350970<br>27.5 |
| 62 | 1-Methyl-4-(1-methyl-2-propenyl)-benzene                         | C13<br>H18           | -1.55 | 174.140<br>58 | 18.94<br>7 | 3255089<br>27.1 |
| 63 | Vanillin                                                         | C8 H8<br>O3          | -1.47 | 152.047<br>12 | 9.205      | 3144995<br>36.3 |
| 64 | 2-Ethyltoluene                                                   | C9 H12               | -1.36 | 120.093<br>74 | 19.36<br>1 | 3029598<br>28.6 |
| 65 | citaurin                                                         | C30<br>H40<br>O2     | -3.05 | 432.301<br>51 | 22.04<br>6 | 2654243<br>39.3 |
| 66 | 13(S)-HOTrE                                                      | C18<br>H30<br>O3     | -2.07 | 294.218<br>89 | 18.65<br>8 | 2533066<br>61.7 |



|    |                                                                                                |                      |       |               |            |                 |
|----|------------------------------------------------------------------------------------------------|----------------------|-------|---------------|------------|-----------------|
| 67 | Tapentadol                                                                                     | C14<br>H23 N<br>O    | -2.48 | 221.177<br>42 | 11.72<br>7 | 2360887<br>94.5 |
| 68 | (8Z,11Z,14Z)-heptadecatrienoic acid                                                            | C17<br>H28<br>O2     | -2.16 | 264.208<br>36 | 20.12<br>4 | 2299076<br>37.4 |
| 69 | 3,6-Anhydro-1-O-palmitoylhexitol                                                               | C22<br>H42<br>O6     | -2.8  | 402.297<br>01 | 23.00<br>7 | 2212833<br>35.7 |
| 70 | Linoleoyl ethanolamide                                                                         | C20<br>H37 N<br>O2   | -4.16 | 323.281<br>08 | 17.41<br>6 | 2131231<br>16.3 |
| 71 | Ferulic acid                                                                                   | C10<br>H10<br>O4     | -4.12 | 194.057<br>11 | 10.48<br>6 | 2067817<br>09.5 |
| 72 | 5-Pentylresorcinol                                                                             | C11<br>H16<br>O2     | -2.77 | 180.114<br>53 | 13.83<br>6 | 2025544<br>56.5 |
| 73 | 9(Z),11(E),13(E)-Octadecatrienoic Acid methyl ester                                            | C19<br>H32<br>O2     | -3.78 | 292.239<br>13 | 20.95<br>4 | 1983259<br>31.6 |
| 74 | (11E)-15-Oxo-11-icosenoic acid                                                                 | C20<br>H36<br>O3     | -3.31 | 324.265<br>37 | 21.92<br>4 | 1923538<br>81.8 |
| 75 | 1-(7,8-Dimethoxy-2,2-dimethyl-2H-chromen-6-yl)ethanone                                         | C15<br>H18<br>O4     | -2.79 | 262.119<br>78 | 17.02<br>6 | 1902883<br>45.4 |
| 76 | 8-Hydroxy-5,8a-dimethyl-3-methylene-3a,4,4a,7,8,8a,9,9a-octahydronaphtho[2,3-b]furan-2(3H)-one | C15<br>H20<br>O3     | -3.04 | 248.140<br>49 | 18.39      | 1892165<br>10   |
| 77 | 1-Stearoyl-2-hydroxy-sn-glycero-3-PE                                                           | C23<br>H48 N<br>O7 P | 2.24  | 481.317<br>92 | 21.91<br>4 | 1729003<br>35.8 |
| 78 | 12-oxo Phytodienoic Acid                                                                       | C18<br>H28<br>O3     | -2.51 | 292.203<br>11 | 16.93<br>5 | 1514229<br>30.9 |
| 79 | (2R)-3-Hydroxy-2-[(9Z,12E)-9,12-octadecadienoyloxy]propyl 2-(trimethylammonio)ethyl phosphate  | C26<br>H50 N<br>O7 P | -2.74 | 519.331<br>06 | 21.04      | 1361617<br>00.3 |
| 80 | DL-carvone                                                                                     | C10<br>H14 O         | -2.35 | 150.104<br>11 | 13.72<br>3 | 1350441<br>05.6 |
| 81 | 9(S)-HpOTrE                                                                                    | C18<br>H30<br>O4     | -1.9  | 310.213<br>82 | 16.95<br>4 | 1271327<br>71.3 |
| 82 | (15Z)-9,12,13-Trihydroxy-15-octadecenoic acid                                                  | C18<br>H34<br>O5     | -2.25 | 330.239<br>88 | 16.71<br>1 | 1231487<br>09.5 |

|    |                                                                     |                     |       |               |            |                 |
|----|---------------------------------------------------------------------|---------------------|-------|---------------|------------|-----------------|
| 83 | 3-oxopalmitic acid                                                  | C16<br>H30<br>O3    | -2.37 | 270.218<br>85 | 20.85<br>7 | 1148304<br>50.8 |
| 84 | 6-Hydroxy-2,3,4-trimethoxybenzoic acid                              | C10<br>H12<br>O6    | -2.35 | 228.062<br>85 | 1.482      | 1142056<br>34.8 |
| 85 | 2(N)-Methyl-norsalsolinol                                           | C10<br>H13 N<br>O2  | -2.13 | 179.094<br>25 | 9.838      | 8962733<br>3.47 |
| 86 | 4-methoxy-6-(prop-2-en-1-yl)-2H-1,3-benzodioxole                    | C11<br>H12<br>O3    | -2.14 | 192.078<br>23 | 13.07<br>2 | 8738365<br>7.19 |
| 87 | Nicotinic acid                                                      | C6 H5<br>N O2       | -2.03 | 123.031<br>78 | 21.42<br>2 | 8200516<br>6.33 |
| 88 | (9S,10S)-10-Hydroxy-9-(phosphonooxy)octadecanoic acid               | C18<br>H37<br>O7 P  | -3.27 | 396.226<br>39 | 20.03      | 7509159<br>6.97 |
| 89 | NP-015687                                                           | C19<br>H16<br>O4    | -2.73 | 308.104<br>02 | 16.56      | 7378551<br>6.74 |
| 90 | Citral                                                              | C10<br>H16 O        | -2.98 | 152.119<br>66 | 17.56<br>5 | 7078606<br>1.68 |
| 91 | Methylstyrylpyron                                                   | C14<br>H12<br>O4    | -2.6  | 244.072<br>92 | 16.71      | 7035768<br>5.76 |
| 92 | 2,3,4,9-Tetrahydro-1H- $\beta$ -carboline-3-carboxylic acid         | C12<br>H12<br>N2 O2 | -1.91 | 216.089<br>46 | 7.296      | 6222263<br>3.61 |
| 93 | (2S)-2,3-Dihydroxypropyl (9Z)-9-hexadecenoate                       | C19<br>H36<br>O4    | -3.42 | 328.260<br>24 | 19.81<br>9 | 6179148<br>1.82 |
| 94 | (+)-(S)-Carvone                                                     | C10<br>H14 O        | -2.35 | 150.104<br>11 | 11.27<br>5 | 6153951<br>8.31 |
| 95 | 1-Methyl-1,2,3,4-tetrahydro- $\hat{P}$ -carboline-3-carboxylic acid | C13<br>H14<br>N2 O2 | -3.78 | 230.104<br>66 | 8.362      | 5275379<br>7.35 |
| 96 | cis-12-Octadecenoic acid methyl ester                               | C19<br>H36<br>O2    | -3.7  | 296.270<br>43 | 20.54<br>5 | 5150668<br>3.22 |
| 97 | m-Cresol                                                            | C7 H8<br>O          | 0.05  | 108.057<br>52 | 17.86<br>9 | 5115550<br>4.38 |
| 98 | (2E,4E,7E)-2,4,7-Decatrienoic acid                                  | C10<br>H14<br>O2    | -2.37 | 166.098<br>99 | 10.70<br>9 | 5107034<br>4.43 |
| 99 | Ethyl oleate                                                        | C20<br>H38<br>O2    | -4.8  | 310.285<br>69 | 22.24<br>1 | 5046085<br>1.23 |

|     |                                                                                         |                     |       |               |            |                 |
|-----|-----------------------------------------------------------------------------------------|---------------------|-------|---------------|------------|-----------------|
| 100 | Apocynin                                                                                | C9 H10<br>O3        | -2.23 | 166.062<br>62 | 12.91<br>4 | 4961521<br>4.04 |
| 101 | (-)-isopiperitenone                                                                     | C10<br>H14 O        | -2.46 | 150.104<br>1  | 11.49<br>4 | 4818211<br>2.4  |
| 102 | NP-003672                                                                               | C15<br>H14<br>O2    | -2.89 | 226.098<br>73 | 14.55<br>5 | 4674234<br>4.31 |
| 103 | Ibuprofen                                                                               | C13<br>H18<br>O2    | -2.29 | 206.130<br>21 | 12.95<br>6 | 4537867<br>0.95 |
| 104 | 4-(4-hydroxy-2-methoxy-3,5,6-trimethylbenzoyloxy)-2-methoxy-3,5,6-trimethylbenzoic acid | C22<br>H26<br>O7    | -2.93 | 402.166<br>67 | 13.06<br>3 | 4079398<br>2.98 |
| 105 | Quercetin                                                                               | C15<br>H10<br>O7    | -2.64 | 302.041<br>85 | 13.54<br>7 | 3932029<br>9.41 |
| 106 | 3,4-Dihydroxycinnamaldehyde                                                             | C9 H8<br>O3         | -2.2  | 164.046<br>98 | 14.03<br>5 | 3921583<br>0.21 |
| 107 | N-[(2E)-3-(3,4-Dihydroxyphenyl)-2-propenoyl]tryptophan                                  | C20<br>H18<br>N2 O5 | -4.69 | 366.119<br>86 | 22.53<br>2 | 3872685<br>0.42 |
| 108 | Palmitic acid                                                                           | C16<br>H32<br>O2    | -2.97 | 256.239<br>47 | 21.61<br>2 | 3835196<br>1.64 |
| 109 | Corchoric fatty acid F                                                                  | C18<br>H32<br>O5    | -2.37 | 328.224<br>2  | 15.44<br>9 | 3675739<br>8.95 |
| 110 | 4-Ethylguaiaicol                                                                        | C9 H12<br>O2        | -2.23 | 152.083<br>39 | 14.91<br>1 | 3290740<br>8.94 |
| 111 | trans-10-Heptadecenoic acid                                                             | C17<br>H32<br>O2    | -2.66 | 268.239<br>52 | 17.86<br>1 | 3220574<br>0    |
| 112 | 3-dehydro-6-deoxoteasterone                                                             | C28<br>H48<br>O3    | -4.18 | 432.358<br>54 | 21.73<br>1 | 3083786<br>4.78 |
| 113 | geranyl quinone                                                                         | C16<br>H20<br>O2    | -2.98 | 244.145<br>6  | 22.51<br>8 | 3020629<br>3.08 |
| 114 | NP-015559                                                                               | C17<br>H14<br>O7    | -3.03 | 330.072<br>95 | 15.18<br>6 | 2727792<br>1.65 |
| 115 | (10S)-Juvenile hormone III acid diol                                                    | C15<br>H26<br>O4    | -2.79 | 270.182<br>36 | 14.93<br>4 | 2472498<br>6.51 |
| 116 | 4-Coumaric acid                                                                         | C9 H8<br>O3         | -1.73 | 164.047<br>06 | 10.03<br>8 | 2469656<br>0.89 |

|     |                                             |                   |       |               |            |                 |
|-----|---------------------------------------------|-------------------|-------|---------------|------------|-----------------|
| 117 | 10,16-Dihydroxyhexadecanoic acid            | C16<br>H32<br>O4  | -2.45 | 288.229<br>35 | 17.97<br>5 | 2010315<br>8.23 |
| 118 | COSMENE                                     | C10<br>H14        | -1.64 | 134.109<br>33 | 11.29      | 1881719<br>8.48 |
| 119 | 3-Dimethylallyl-4-hydroxymandelic acid      | C13<br>H16<br>O4  | -3.89 | 236.103<br>94 | 13.87<br>9 | 1847392<br>7.57 |
| 120 | Levallorphan                                | C19<br>H25 N<br>O | -1.7  | 283.193<br>13 | 11.49<br>9 | 1823620<br>9.55 |
| 121 | 12-HSA                                      | C18<br>H36<br>O3  | -3.19 | 300.265<br>49 | 17.29<br>2 | 1771318<br>7.6  |
| 122 | (2Z)-2-(4-Hydroxybenzylidene)heptanoic acid | C14<br>H18<br>O3  | -0.1  | 234.125<br>57 | 15.18<br>2 | 1731720<br>7.37 |
| 123 | Vitamin A                                   | C20<br>H30 O      | -2.89 | 286.228<br>84 | 20.76<br>5 | 1696151<br>6.47 |
| 124 | coenzyme Q2                                 | C19<br>H26<br>O4  | -3.9  | 318.181<br>87 | 18.49      | 1508009<br>0.56 |
| 125 | Octyl gallate                               | C15<br>H22<br>O5  | -2.64 | 282.145<br>98 | 14.47<br>1 | 1456406<br>5.2  |
| 126 | 4-Methoxycinnamaldehyde                     | C10<br>H10<br>O2  | -2.5  | 162.067<br>67 | 10.77<br>1 | 1449444<br>6.9  |
| 127 | Guaiacol                                    | C7 H8<br>O2       | -0.66 | 124.052<br>35 | 9.207      | 1434320<br>1.65 |
| 128 | Methyl linoleate                            | C19<br>H34<br>O2  | -3.97 | 294.254<br>71 | 20.68<br>6 | 1421148<br>0.42 |
| 129 | Eicosapentanoic acid                        | C20<br>H30<br>O2  | -3.49 | 302.223<br>52 | 22.58      | 1420870<br>3.13 |
| 130 | Nandrolone                                  | C18<br>H26<br>O2  | -2.76 | 274.192<br>52 | 14.80<br>7 | 1324336<br>7.08 |
| 131 | (4E)-1-(4-Hydroxyphenyl)-4-decen-3-one      | C16<br>H22<br>O2  | -3    | 246.161<br>24 | 16.03<br>7 | 1247848<br>9.91 |
| 132 | 2-Methoxyresorcinol                         | C7 H8<br>O3       | -3.01 | 140.046<br>92 | 9.645      | 1241162<br>3.58 |
| 133 | 7-Hydroxyflavan                             | C15<br>H14<br>O2  | -2.89 | 226.098<br>73 | 11.65<br>3 | 1135984<br>3.24 |

|     |                                           |                  |       |               |            |                 |
|-----|-------------------------------------------|------------------|-------|---------------|------------|-----------------|
| 134 | 4,8,12-trimethyltrideca 1,3,7,11-tetraene | C16<br>H26       | -2.81 | 218.202<br>84 | 20.81<br>6 | 9897947<br>.401 |
| 135 | Eicosapentanoic acid                      | C20<br>H30<br>O2 | -3.49 | 302.223<br>52 | 22.17<br>3 | 8676767<br>.851 |
| 136 | 3-Methyl-2-butenyl caffeate               | C14<br>H16<br>O4 | -1.47 | 248.104<br>49 | 13.21<br>4 | 8511089<br>.247 |
| 137 | Thymoquinone                              | C10<br>H12<br>O2 | -1.6  | 164.083<br>47 | 12.50<br>5 | 8440170<br>.481 |
| 138 | Isorhamnetin                              | C16<br>H12<br>O7 | -2.22 | 316.057<br>6  | 14.84<br>3 | 8058961<br>.505 |
| 139 | 2-Octenoic acid                           | C8 H14<br>O2     | -1.16 | 142.099<br>21 | 10.80<br>7 | 7572010<br>.605 |
| 140 | 1-(3,4-Dihydroxyphenyl)acetone            | C9 H10<br>O3     | -2.23 | 166.062<br>62 | 10.76      | 6400114<br>.457 |

Supplementary material 6

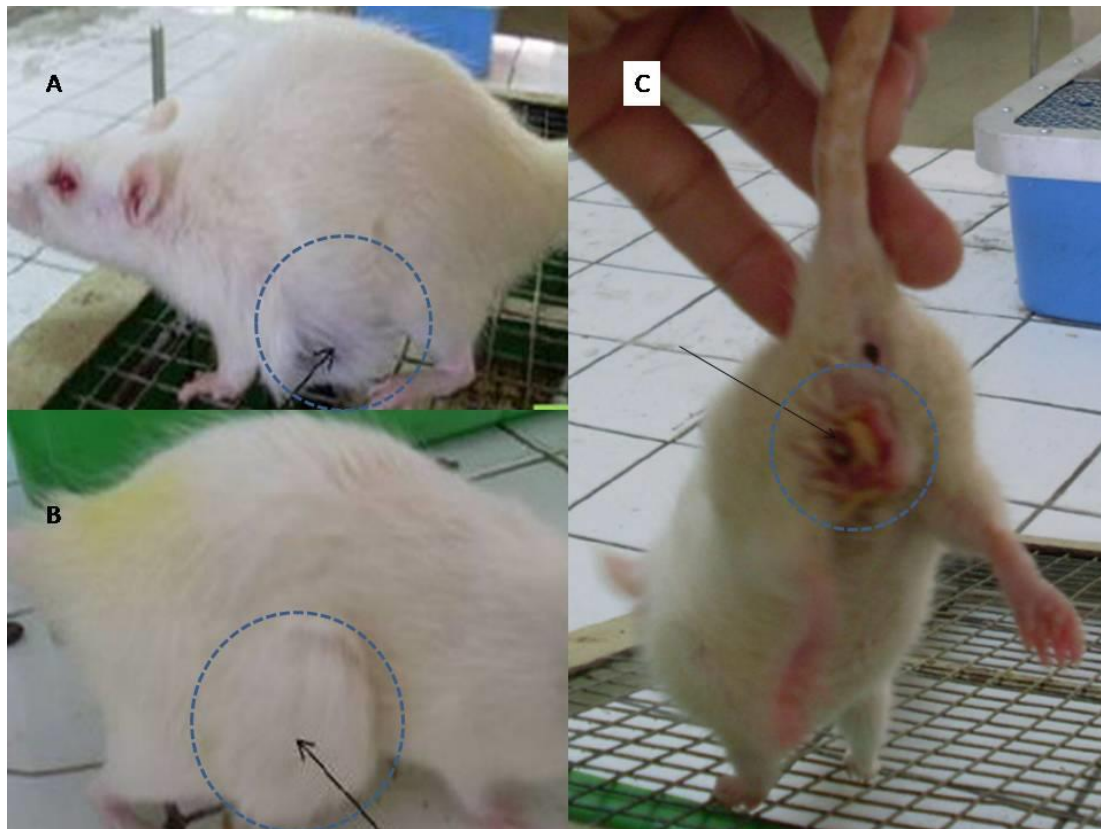

**Figure 8.** Nodules (arrows) were formed in the mammary gland in the 20th week of observation of SD rats after receiving CXBCH 2 weeks before and five weeks after DMBA induction. Nodules formed in all parts of the mammary gland (fore legs (A), near the hind legs (B), and some nodules break up (C). Note: Arrows indicate nodules
